# Supplementary material for: Fatty acids and their sn-2 positional distribution in breast milk and their association with edible oils in maternal diet: a study of five regions in China
Source: Royal Society of Chemistry journal article supplement (doi:10.1039/d3fo00590a), 2023-01-01
Supplement: d3fo00590a1.pdf [file d3fo00590a1.pdf]

*Electronic supplementary information (ESI)*

Fatty acids and *sn*-2 position distribution in breast milk and association with edible oils in maternal diet: a study of five regions in China

Fangmin Wang <sup>a,b</sup>, Jiahui Yu <sup>a,b</sup>, Li Wang <sup>c</sup>, Shuai Wang <sup>c</sup>, Qingzhe Jin <sup>a,b</sup>, Qingyun Wang <sup>c,\*</sup>, Wei Wei <sup>a,b,\*</sup>, and Xingguo Wang <sup>a,b</sup>

*a. State Key Laboratory of Food Science and Technology, Jiangnan University, Wuxi, China*

*b. Collaborative Innovation Center of Food Safety and Quality Control in Jiangsu Province, School of Food Science and Technology, Jiangnan University, Wuxi, China*

*c. Beidahuang Wondersun Dairy Company Limited, Harbin, China*

\* Corresponding author

Tel.: +86 510 85329050. *Email address:* [weiw@jiangnan.edu.cn](mailto:weiw@jiangnan.edu.cn) (W. Wei). Tel.: +86 451

85986030. *Email address:* [qywang2006@126.com](mailto:qywang2006@126.com) (Q. Wang).

**Table S1.** Fatty acids composition of the triacylglycerol (TAG) and the 2-monoglycerol (2-MAG) of different oil samples

|          | Soybean oil |                       | Corn oil |                       | Sunflower oil |                       | Peanut oil |                       | Rapeseed oil |                       | Olive oil |                       |
|----------|-------------|-----------------------|----------|-----------------------|---------------|-----------------------|------------|-----------------------|--------------|-----------------------|-----------|-----------------------|
|          | Total       | <i>sn</i> -2 position | Total    | <i>sn</i> -2 position | Total         | <i>sn</i> -2 position | Total      | <i>sn</i> -2 position | Total        | <i>sn</i> -2 position | Total     | <i>sn</i> -2 position |
| 14:0     | 0.09        | -                     | -        | -                     | -             | -                     | -          | -                     | -            | -                     | -         | -                     |
| 16:0     | 10.74       | 3.56                  | 12.30    | 4.20                  | 12.30         | 4.58                  | 10.78      | 6.47                  | 4.16         | 1.81                  | 10.79     | 4.83                  |
| 17:0     | 0.12        | -                     | 0.09     | -                     | 0.09          | -                     | 0.10       | -                     | 0.12         | -                     | 0.07      | -                     |
| 18:0     | 4.49        | 1.92                  | 2.00     | 0.99                  | 2.00          | 2.40                  | 3.41       | 5.61                  | 1.74         | 0.88                  | 3.30      | 1.07                  |
| 20:0     | 0.33        | -                     | 0.49     | -                     | 0.49          | -                     | 1.03       | 0.53                  | 0.50         | -                     | 0.46      | -                     |
| 22:0     | 0.42        | -                     | 0.16     | -                     | 0.16          | -                     | 1.58       | -                     | 0.34         | -                     | 0.12      | -                     |
| 24:0     | 0.16        | -                     | 0.20     | -                     | 0.20          | -                     | 1.33       | -                     | 0.18         | -                     | 0.06      | -                     |
| 16:1 n-7 | 0.10        | -                     | 0.10     | -                     | 0.10          | -                     | 0.09       | -                     | 0.25         | -                     | 0.80      | -                     |
| 17:1 n-7 | 0.06        | -                     | 0.05     | -                     | 0.05          | -                     | 0.06       | -                     | -            | -                     | 0.10      | -                     |
| 18:1 n-9 | 22.98       | 22.45                 | 31.28    | 29.63                 | 31.28         | 22.81                 | 45.67      | 40.05                 | 61.84        | 52.80                 | 78.37     | 80.93                 |
| 20:1 n-9 | 0.40        | -                     | 0.44     | 1.17                  | 0.44          | 0.35                  | 1.44       | 0.43                  | 0.62         | 1.10                  | 0.41      | 1.51                  |
| 18:2 n-6 | 52.68       | 65.38                 | 51.81    | 61.81                 | 51.81         | 69.60                 | 33.24      | 46.12                 | 20.11        | 31.38                 | 4.51      | 11.66                 |
| 18:3 n-6 | 0.17        | -                     | 0.24     | 1.11                  | 0.24          | 0.26                  | 1.07       | -                     | 1.24         | -                     | 0.24      | -                     |
| 18:3 n-3 | 6.70        | 6.68                  | 0.66     | 1.09                  | 0.66          | -                     | 0.14       | -                     | 7.68         | 12.03                 | 0.64      | -                     |
| SFAs     | 16.35       | 5.48                  | 15.24    | 5.19                  | 15.24         | 6.98                  | 18.23      | 3.92                  | 7.04         | 2.69                  | 14.8      | 5.90                  |
| MUFAs    | 23.54       | 22.45                 | 31.87    | 30.8                  | 31.87         | 22.96                 | 47.26      | 43.32                 | 62.71        | 53.90                 | 79.68     | 82.44                 |
| PUFAs    | 59.55       | 72.06                 | 52.71    | 64.01                 | 52.71         | 70.06                 | 34.45      | 52.76                 | 29.03        | 43.41                 | 5.39      | 11.66                 |

Data in the table were from the our previous study.<sup>23</sup>

**Table S2.** Composition of total fatty acids (%) in breast milk in five regions of China

| Fatty acids | Lactational Stage | Total samples            | Chengdu §                 | Nanning §                  | Tianjin §                  | Wuhan §                    | Xi'an §                     | S ¶ | R ¶ | S × R ¶ |
|-------------|-------------------|--------------------------|---------------------------|----------------------------|----------------------------|----------------------------|-----------------------------|-----|-----|---------|
| 8:0         | Colostrum         | 0.08 ± 0.14 <sup>c</sup> | 0.06 ± 0.04 <sup>cY</sup> | 0.04 ± 0.04 <sup>cY</sup>  | 0.18 ± 0.28 <sup>aX</sup>  | 0.04 ± 0.02 <sup>cY</sup>  | 0.06 ± 0.05 <sup>bY</sup>   | *** | *** | **      |
|             | Transitional      | 0.11 ± 0.05 <sup>b</sup> | 0.09 ± 0.03 <sup>bY</sup> | 0.09 ± 0.04 <sup>bY</sup>  | 0.12 ± 0.04 <sup>aXY</sup> | 0.13 ± 0.06 <sup>bX</sup>  | 0.14 ± 0.06 <sup>aX</sup>   |     |     |         |
|             | Mature            | 0.14 ± 0.06 <sup>a</sup> | 0.12 ± 0.03 <sup>aY</sup> | 0.12 ± 0.04 <sup>aY</sup>  | 0.16 ± 0.04 <sup>aX</sup>  | 0.17 ± 0.08 <sup>aX</sup>  | 0.14 ± 0.06 <sup>aXY</sup>  |     |     |         |
| 13:0        | Colostrum         | 0.02 ± 0.01 <sup>a</sup> | 0.03 ± 0.03 <sup>aX</sup> | 0.02 ± 0.01 <sup>aY</sup>  | 0.01 ± 0.01 <sup>aY</sup>  | 0.01 ± 0.00 <sup>bY</sup>  | 0.02 ± 0.01 <sup>aY</sup>   | NS  | NS  | **      |
|             | Transitional      | 0.02 ± 0.01 <sup>a</sup> | 0.02 ± 0.01 <sup>aX</sup> | 0.02 ± 0.01 <sup>aX</sup>  | 0.02 ± 0.01 <sup>aX</sup>  | 0.02 ± 0.01 <sup>aX</sup>  | 0.02 ± 0.01 <sup>aX</sup>   |     |     |         |
|             | Mature            | 0.02 ± 0.01 <sup>a</sup> | 0.02 ± 0.00 <sup>aX</sup> | 0.02 ± 0.01 <sup>aX</sup>  | 0.02 ± 0.01 <sup>aX</sup>  | 0.02 ± 0.01 <sup>aX</sup>  | 0.02 ± 0.01 <sup>aX</sup>   |     |     |         |
| 20:0        | Colostrum         | 0.12 ± 0.07 <sup>a</sup> | 0.15 ± 0.05 <sup>aX</sup> | 0.15 ± 0.03 <sup>bX</sup>  | 0.14 ± 0.12 <sup>aXY</sup> | 0.07 ± 0.03 <sup>aZ</sup>  | 0.11 ± 0.03 <sup>aYZ</sup>  | *   | *** | **      |
|             | Transitional      | 0.11 ± 0.06 <sup>a</sup> | 0.15 ± 0.07 <sup>aX</sup> | 0.16 ± 0.03 <sup>abX</sup> | 0.09 ± 0.02 <sup>bY</sup>  | 0.02 ± 0.04 <sup>bZ</sup>  | 0.11 ± 0.01 <sup>aY</sup>   |     |     |         |
|             | Mature            | 0.11 ± 0.07 <sup>a</sup> | 0.19 ± 0.04 <sup>aX</sup> | 0.17 ± 0.03 <sup>aX</sup>  | 0.10 ± 0.03 <sup>abY</sup> | 0.02 ± 0.02 <sup>bZ</sup>  | 0.10 ± 0.02 <sup>aY</sup>   |     |     |         |
| 22:0        | Colostrum         | 0.02 ± 0.02 <sup>a</sup> | 0.03 ± 0.01 <sup>aX</sup> | 0.04 ± 0.02 <sup>bX</sup>  | 0.01 ± 0.01 <sup>aY</sup>  | 0.01 ± 0.01 <sup>aY</sup>  | 0.03 ± 0.01 <sup>bX</sup>   | **  | *** | *       |
|             | Transitional      | 0.03 ± 0.03 <sup>a</sup> | 0.03 ± 0.01 <sup>aY</sup> | 0.04 ± 0.02 <sup>bY</sup>  | 0.02 ± 0.03 <sup>aYZ</sup> | 0.01 ± 0.01 <sup>aZ</sup>  | 0.05 ± 0.04 <sup>aX</sup>   |     |     |         |
|             | Mature            | 0.03 ± 0.03 <sup>a</sup> | 0.04 ± 0.02 <sup>aY</sup> | 0.06 ± 0.04 <sup>aX</sup>  | 0.02 ± 0.02 <sup>aZ</sup>  | 0.01 ± 0.01 <sup>aZ</sup>  | 0.05 ± 0.04 <sup>abXY</sup> |     |     |         |
| 24:0        | Colostrum         | 0.17 ± 0.08 <sup>a</sup> | 0.16 ± 0.08 <sup>aY</sup> | 0.17 ± 0.06 <sup>aY</sup>  | 0.22 ± 0.12 <sup>aX</sup>  | 0.14 ± 0.05 <sup>aY</sup>  | 0.13 ± 0.05 <sup>aY</sup>   | *** | *** | **      |
|             | Transitional      | 0.10 ± 0.05 <sup>b</sup> | 0.10 ± 0.05 <sup>bX</sup> | 0.13 ± 0.06 <sup>bX</sup>  | 0.11 ± 0.06 <sup>bX</sup>  | 0.05 ± 0.02 <sup>bY</sup>  | 0.10 ± 0.04 <sup>bX</sup>   |     |     |         |
|             | Mature            | 0.09 ± 0.05 <sup>b</sup> | 0.09 ± 0.05 <sup>bY</sup> | 0.13 ± 0.06 <sup>bX</sup>  | 0.09 ± 0.03 <sup>bY</sup>  | 0.04 ± 0.02 <sup>bZ</sup>  | 0.09 ± 0.04 <sup>bY</sup>   |     |     |         |
| 14:1        | Colostrum         | 0.04 ± 0.03 <sup>a</sup> | 0.05 ± 0.03 <sup>aX</sup> | 0.05 ± 0.03 <sup>aX</sup>  | 0.02 ± 0.01 <sup>bY</sup>  | 0.02 ± 0.01 <sup>bY</sup>  | 0.05 ± 0.02 <sup>aX</sup>   | **  | *** | NS      |
|             | Transitional      | 0.05 ± 0.04 <sup>a</sup> | 0.05 ± 0.03 <sup>aX</sup> | 0.07 ± 0.06 <sup>aX</sup>  | 0.03 ± 0.02 <sup>bY</sup>  | 0.05 ± 0.04 <sup>aXY</sup> | 0.05 ± 0.02 <sup>aXY</sup>  |     |     |         |

|                       |             |                          |                             |                            |                             |                            |                            |     |     |    |
|-----------------------|-------------|--------------------------|-----------------------------|----------------------------|-----------------------------|----------------------------|----------------------------|-----|-----|----|
|                       | 1           |                          |                             |                            |                             |                            |                            |     |     |    |
| 16:1 n-7              | Mature      | 0.05 ± 0.03 <sup>a</sup> | 0.05 ± 0.03 <sup>aXY</sup>  | 0.07 ± 0.05 <sup>aX</sup>  | 0.04 ± 0.02 <sup>aY</sup>   | 0.04 ± 0.02 <sup>abY</sup> | 0.06 ± 0.02 <sup>aXY</sup> |     |     |    |
|                       | Colostrum   | 1.93 ± 0.45 <sup>b</sup> | 2.16 ± 0.40 <sup>aX</sup>   | 2.01 ± 0.45 <sup>bXY</sup> | 1.62 ± 0.36 <sup>bZ</sup>   | 1.86 ± 0.32 <sup>bYZ</sup> | 2.04 ± 0.52 <sup>aXY</sup> | *** | *** | NS |
|                       | Transitiona | 2.13 ± 0.54 <sup>a</sup> | 2.35 ± 0.71 <sup>aX</sup>   | 2.22 ± 0.53 <sup>abX</sup> | 1.82 ± 0.44 <sup>abY</sup>  | 2.19 ± 0.36 <sup>aX</sup>  | 2.09 ± 0.56 <sup>aXY</sup> |     |     |    |
|                       | 1           |                          |                             |                            |                             |                            |                            |     |     |    |
| 17:1 n-7              | Mature      | 2.25 ± 0.59 <sup>a</sup> | 2.19 ± 0.68 <sup>aXY</sup>  | 2.34 ± 0.53 <sup>aXY</sup> | 2.00 ± 0.50 <sup>aY</sup>   | 2.42 ± 0.70 <sup>aX</sup>  | 2.26 ± 0.48 <sup>aXY</sup> |     |     |    |
|                       | Colostrum   | 0.12 ± 0.05 <sup>a</sup> | 0.12 ± 0.04 <sup>aX</sup>   | 0.11 ± 0.02 <sup>bX</sup>  | 0.13 ± 0.09 <sup>aX</sup>   | 0.11 ± 0.02 <sup>aX</sup>  | 0.11 ± 0.04 <sup>aX</sup>  | NS  | NS  | NS |
|                       | Transitiona | 0.12 ± 0.03 <sup>a</sup> | 0.12 ± 0.04 <sup>aXY</sup>  | 0.13 ± 0.03 <sup>abX</sup> | 0.10 ± 0.02 <sup>aY</sup>   | 0.12 ± 0.03 <sup>aXY</sup> | 0.11 ± 0.03 <sup>aXY</sup> |     |     |    |
|                       | 1           |                          |                             |                            |                             |                            |                            |     |     |    |
| 18:1 n-9 <sup>t</sup> | Mature      | 0.12 ± 0.03 <sup>a</sup> | 0.13 ± 0.03 <sup>aXY</sup>  | 0.14 ± 0.04 <sup>aX</sup>  | 0.12 ± 0.03 <sup>aXYZ</sup> | 0.11 ± 0.02 <sup>aYZ</sup> | 0.10 ± 0.02 <sup>aZ</sup>  |     |     |    |
|                       | Colostrum   | 0.04 ± 0.03 <sup>a</sup> | 0.04 ± 0.03 <sup>bY</sup>   | 0.06 ± 0.03 <sup>bX</sup>  | 0.01 ± 0.02 <sup>aZ</sup>   | 0.02 ± 0.02 <sup>aZ</sup>  | 0.04 ± 0.03 <sup>aXY</sup> | **  | *** | ** |
|                       | Transitiona | 0.04 ± 0.03 <sup>a</sup> | 0.04 ± 0.02 <sup>bY</sup>   | 0.07 ± 0.03 <sup>bX</sup>  | 0.02 ± 0.01 <sup>aZ</sup>   | 0.02 ± 0.02 <sup>aZ</sup>  | 0.04 ± 0.03 <sup>aY</sup>  |     |     |    |
|                       | 1           |                          |                             |                            |                             |                            |                            |     |     |    |
| 20:1 n-9              | Mature      | 0.05 ± 0.05 <sup>a</sup> | 0.07 ± 0.03 <sup>aY</sup>   | 0.10 ± 0.08 <sup>aX</sup>  | 0.02 ± 0.01 <sup>aZ</sup>   | 0.03 ± 0.02 <sup>aZ</sup>  | 0.03 ± 0.03 <sup>aZ</sup>  |     |     |    |
|                       | Colostrum   | 0.69 ± 0.28 <sup>a</sup> | 0.70 ± 0.24 <sup>aY</sup>   | 0.61 ± 0.16 <sup>aYZ</sup> | 0.87 ± 0.26 <sup>aX</sup>   | 0.75 ± 0.35 <sup>aXY</sup> | 0.48 ± 0.22 <sup>aZ</sup>  | *** | *** | NS |
|                       | Transitiona | 0.48 ± 0.26 <sup>b</sup> | 0.52 ± 0.19 <sup>aX</sup>   | 0.55 ± 0.29 <sup>aX</sup>  | 0.54 ± 0.21 <sup>bX</sup>   | 0.46 ± 0.38 <sup>bXY</sup> | 0.33 ± 0.10 <sup>bY</sup>  |     |     |    |
|                       | 1           |                          |                             |                            |                             |                            |                            |     |     |    |
| 18:2 n-6 <sup>t</sup> | Mature      | 0.49 ± 0.36 <sup>b</sup> | 0.63 ± 0.44 <sup>aX</sup>   | 0.51 ± 0.30 <sup>aXY</sup> | 0.43 ± 0.20 <sup>bXY</sup>  | 0.57 ± 0.53 <sup>abX</sup> | 0.29 ± 0.07 <sup>bZ</sup>  |     |     |    |
|                       | Colostrum   | 0.05 ± 0.03 <sup>a</sup> | 0.05 ± 0.04 <sup>aXYZ</sup> | 0.06 ± 0.02 <sup>aXY</sup> | 0.04 ± 0.02 <sup>aYZ</sup>  | 0.03 ± 0.02 <sup>aZ</sup>  | 0.06 ± 0.03 <sup>aX</sup>  | NS  | *** | NS |
|                       | Transitiona | 0.05 ± 0.04 <sup>a</sup> | 0.06 ± 0.03 <sup>aXY</sup>  | 0.06 ± 0.02 <sup>aY</sup>  | 0.03 ± 0.02 <sup>bZ</sup>   | 0.02 ± 0.02 <sup>abZ</sup> | 0.08 ± 0.05 <sup>aX</sup>  |     |     |    |
|                       | 1           |                          |                             |                            |                             |                            |                            |     |     |    |
| 18:3 n-6              | Mature      | 0.05 ± 0.03 <sup>a</sup> | 0.06 ± 0.03 <sup>aX</sup>   | 0.06 ± 0.03 <sup>aX</sup>  | 0.03 ± 0.02 <sup>abY</sup>  | 0.02 ± 0.01 <sup>bY</sup>  | 0.08 ± 0.04 <sup>aX</sup>  |     |     |    |
|                       | Colostrum   | 0.06 ± 0.04 <sup>c</sup> | 0.08 ± 0.04 <sup>bX</sup>   | 0.06 ± 0.04 <sup>cXY</sup> | 0.04 ± 0.04 <sup>bZ</sup>   | 0.04 ± 0.02 <sup>bYZ</sup> | 0.07 ± 0.04 <sup>bX</sup>  | *** | *** | NS |
|                       | Transitiona | 0.09 ± 0.04 <sup>b</sup> | 0.09 ± 0.05 <sup>bX</sup>   | 0.10 ± 0.05 <sup>bX</sup>  | 0.08 ± 0.03 <sup>aXY</sup>  | 0.06 ± 0.04 <sup>abY</sup> | 0.10 ± 0.03 <sup>abX</sup> |     |     |    |
|                       | 1           |                          |                             |                            |                             |                            |                            |     |     |    |
|                       | Mature      | 0.11 ± 0.05 <sup>a</sup> | 0.14 ± 0.04 <sup>aX</sup>   | 0.14 ± 0.06 <sup>aX</sup>  | 0.09 ± 0.03 <sup>aY</sup>   | 0.06 ± 0.03 <sup>aZ</sup>  | 0.12 ± 0.06 <sup>aXY</sup> |     |     |    |

|           |                  |                          |                            |                            |                            |                            |                             |     |     |    |
|-----------|------------------|--------------------------|----------------------------|----------------------------|----------------------------|----------------------------|-----------------------------|-----|-----|----|
| 18:3 n-3t | Colostrum        | 0.06 ± 0.03 <sup>a</sup> | 0.07 ± 0.03 <sup>aX</sup>  | 0.06 ± 0.03 <sup>aXY</sup> | 0.04 ± 0.02 <sup>aZ</sup>  | 0.05 ± 0.03 <sup>aYZ</sup> | 0.07 ± 0.03 <sup>aX</sup>   | NS  | *** | NS |
|           | Transitiona<br>l | 0.05 ± 0.04 <sup>a</sup> | 0.06 ± 0.03 <sup>aXY</sup> | 0.08 ± 0.04 <sup>aX</sup>  | 0.04 ± 0.03 <sup>aYZ</sup> | 0.03 ± 0.02 <sup>bZ</sup>  | 0.07 ± 0.04 <sup>aX</sup>   |     |     |    |
|           | Mature           | 0.06 ± 0.04 <sup>a</sup> | 0.07 ± 0.05 <sup>aXY</sup> | 0.08 ± 0.04 <sup>aX</sup>  | 0.05 ± 0.05 <sup>aYZ</sup> | 0.03 ± 0.03 <sup>abZ</sup> | 0.06 ± 0.03 <sup>aXYZ</sup> |     |     |    |
| 20:2 n-6  | Colostrum        | 1.17 ± 0.38 <sup>a</sup> | 1.05 ± 0.37 <sup>aZ</sup>  | 1.16 ± 0.34 <sup>aXY</sup> | 1.39 ± 0.36 <sup>aX</sup>  | 1.19 ± 0.38 <sup>aXY</sup> | 1.00 ± 0.37 <sup>aZ</sup>   | *** | *** | ** |
|           | Transitiona<br>l | 0.66 ± 0.25 <sup>b</sup> | 0.66 ± 0.19 <sup>bX</sup>  | 0.76 ± 0.23 <sup>bX</sup>  | 0.74 ± 0.26 <sup>bX</sup>  | 0.49 ± 0.16 <sup>bY</sup>  | 0.63 ± 0.33 <sup>bXY</sup>  |     |     |    |
|           | Mature           | 0.51 ± 0.15 <sup>c</sup> | 0.53 ± 0.10 <sup>bX</sup>  | 0.59 ± 0.19 <sup>cX</sup>  | 0.51 ± 0.08 <sup>cX</sup>  | 0.37 ± 0.12 <sup>bY</sup>  | 0.56 ± 0.15 <sup>bX</sup>   |     |     |    |
| 20:3 n-6  | Colostrum        | 0.57 ± 0.16 <sup>a</sup> | 0.59 ± 0.19 <sup>aXY</sup> | 0.66 ± 0.16 <sup>aX</sup>  | 0.61 ± 0.17 <sup>aXY</sup> | 0.46 ± 0.12 <sup>aZ</sup>  | 0.52 ± 0.09 <sup>aYZ</sup>  | *** | *** | *  |
|           | Transitiona<br>l | 0.43 ± 0.18 <sup>b</sup> | 0.52 ± 0.15 <sup>aX</sup>  | 0.56 ± 0.15 <sup>abX</sup> | 0.43 ± 0.13 <sup>bY</sup>  | 0.22 ± 0.09 <sup>bZ</sup>  | 0.42 ± 0.14 <sup>bY</sup>   |     |     |    |
|           | Mature           | 0.40 ± 0.18 <sup>b</sup> | 0.50 ± 0.13 <sup>aX</sup>  | 0.52 ± 0.18 <sup>bX</sup>  | 0.37 ± 0.11 <sup>bY</sup>  | 0.19 ± 0.05 <sup>bZ</sup>  | 0.43 ± 0.16 <sup>bY</sup>   |     |     |    |
| 20:3 n-3  | Colostrum        | 0.09 ± 0.09 <sup>a</sup> | 0.16 ± 0.15 <sup>aX</sup>  | 0.12 ± 0.03 <sup>aX</sup>  | 0.05 ± 0.03 <sup>aY</sup>  | 0.02 ± 0.05 <sup>aY</sup>  | 0.13 ± 0.06 <sup>aX</sup>   | *** | *** | NS |
|           | Transitiona<br>l | 0.06 ± 0.05 <sup>b</sup> | 0.08 ± 0.05 <sup>bX</sup>  | 0.10 ± 0.03 <sup>bX</sup>  | 0.03 ± 0.02 <sup>bY</sup>  | 0.01 ± 0.03 <sup>aY</sup>  | 0.09 ± 0.06 <sup>bX</sup>   |     |     |    |
|           | Mature           | 0.05 ± 0.04 <sup>b</sup> | 0.07 ± 0.02 <sup>bX</sup>  | 0.08 ± 0.02 <sup>bX</sup>  | 0.01 ± 0.01 <sup>cY</sup>  | 0.01 ± 0.04 <sup>aY</sup>  | 0.07 ± 0.03 <sup>bX</sup>   |     |     |    |
| 20:5 n-3  | Colostrum        | 0.04 ± 0.08 <sup>a</sup> | 0.05 ± 0.02 <sup>aXY</sup> | 0.06 ± 0.02 <sup>aX</sup>  | 0.04 ± 0.17 <sup>aXY</sup> | 0.00 ± 0.01 <sup>aY</sup>  | 0.03 ± 0.01 <sup>aXY</sup>  | NS  | *** | NS |
|           | Transitiona<br>l | 0.03 ± 0.03 <sup>a</sup> | 0.06 ± 0.04 <sup>aX</sup>  | 0.06 ± 0.03 <sup>aX</sup>  | 0.00 ± 0.01 <sup>aZ</sup>  | 0.01 ± 0.01 <sup>aZ</sup>  | 0.03 ± 0.01 <sup>aY</sup>   |     |     |    |
|           | Mature           | 0.03 ± 0.03 <sup>a</sup> | 0.07 ± 0.03 <sup>aX</sup>  | 0.05 ± 0.01 <sup>aY</sup>  | 0.01 ± 0.01 <sup>aZ</sup>  | 0.00 ± 0.01 <sup>aZ</sup>  | 0.03 ± 0.01 <sup>aY</sup>   |     |     |    |
| 22:2 n-6  | Colostrum        | 0.17 ± 0.07 <sup>a</sup> | 0.18 ± 0.08 <sup>aXY</sup> | 0.21 ± 0.06 <sup>aX</sup>  | 0.17 ± 0.06 <sup>aXY</sup> | 0.15 ± 0.06 <sup>aY</sup>  | 0.16 ± 0.08 <sup>aY</sup>   | *** | *** | NS |
|           | Transitiona<br>l | 0.09 ± 0.06 <sup>b</sup> | 0.11 ± 0.05 <sup>bXY</sup> | 0.13 ± 0.05 <sup>bX</sup>  | 0.08 ± 0.04 <sup>bYZ</sup> | 0.06 ± 0.05 <sup>bZ</sup>  | 0.09 ± 0.06 <sup>bYZ</sup>  |     |     |    |
|           | Mature           | 0.07 ± 0.03 <sup>c</sup> | 0.08 ± 0.02 <sup>bX</sup>  | 0.09 ± 0.04 <sup>cX</sup>  | 0.06 ± 0.01 <sup>bY</sup>  | 0.03 ± 0.03 <sup>bZ</sup>  | 0.07 ± 0.03 <sup>bY</sup>   |     |     |    |
| 22:5 n-3  | Colostrum        | 0.11 ± 0.06 <sup>a</sup> | 0.13 ± 0.06 <sup>aX</sup>  | 0.13 ± 0.05 <sup>aX</sup>  | 0.11 ± 0.07 <sup>aXY</sup> | 0.07 ± 0.02 <sup>aZ</sup>  | 0.08 ± 0.03 <sup>aYZ</sup>  | *** | *** | NS |
|           | Transitiona      | 0.08 ± 0.05 <sup>b</sup> | 0.11 ± 0.04 <sup>aX</sup>  | 0.11 ± 0.04 <sup>bX</sup>  | 0.06 ± 0.03 <sup>bY</sup>  | 0.03 ± 0.03 <sup>bZ</sup>  | 0.08 ± 0.03 <sup>aY</sup>   |     |     |    |

|        |                   |                      |                      |                      |                      |                      |
|--------|-------------------|----------------------|----------------------|----------------------|----------------------|----------------------|
| 1      |                   |                      |                      |                      |                      |                      |
| Mature | $0.07 \pm 0.04^b$ | $0.10 \pm 0.04^{aX}$ | $0.10 \pm 0.03^{bX}$ | $0.06 \pm 0.02^{bY}$ | $0.02 \pm 0.02^{cZ}$ | $0.07 \pm 0.02^{aY}$ |

Fatty acids in Table S2 are present in breast milk but not discussed in the manuscript. Values are represented as mean  $\pm$  SD. The data was presented as a percentage of the total FAs. The number of mothers in Chengdu, Nanning, Tianjin, Wuhan, and Xi'an were 18, 22, 20, 21 and 19, respectively, for a total of 100. The number of breast milk samples was 54, 66, 60, 63 and 57, respectively, for a total of 300. <sup>§</sup> Different superscript uppercase letters indicate significant differences ( $P < 0.05$ ) with a row; different superscript lowercase letters indicate significant difference ( $P < 0.05$ ) with a column. <sup>¶</sup> R,  $P$  values for the region; S,  $P$  values for lactational stage; R  $\times$  S,  $P$  values for the region by lactational stage. NS,  $P > 0.05$ , \*,  $P < 0.05$ , \*\*,  $P < 0.01$ , \*\*\*,  $P < 0.001$ .

**Table S3.** Composition of *sn*-2 fatty acids (%) in breast milk in five regions in China

| Fatty acids           | Lactational Stage | Total samples            | Chengdu §                  | Nanning §                  | Tianjin §                   | Wuhan §                    | Xi'an §                    | S ¶ | R ¶ | S ×<br>R ¶ |
|-----------------------|-------------------|--------------------------|----------------------------|----------------------------|-----------------------------|----------------------------|----------------------------|-----|-----|------------|
| 13:0                  | Colostrum         | 0.04 ± 0.07 <sup>a</sup> | 0.04 ± 0.01 <sup>aX</sup>  | 0.04 ± 0.02 <sup>aX</sup>  | 0.04 ± 0.02 <sup>aX</sup>   | 0.05 ± 0.15 <sup>aX</sup>  | 0.03 ± 0.01 <sup>bX</sup>  | NS  | NS  | NS         |
|                       | Transitional      | 0.04 ± 0.02 <sup>a</sup> | 0.04 ± 0.01 <sup>aY</sup>  | 0.04 ± 0.02 <sup>aY</sup>  | 0.04 ± 0.02 <sup>aY</sup>   | 0.03 ± 0.01 <sup>aY</sup>  | 0.06 ± 0.03 <sup>aX</sup>  |     |     |            |
|                       | Mature            | 0.03 ± 0.02 <sup>a</sup> | 0.05 ± 0.02 <sup>aX</sup>  | 0.03 ± 0.02 <sup>aYZ</sup> | 0.03 ± 0.01 <sup>aZ</sup>   | 0.03 ± 0.01 <sup>aYZ</sup> | 0.04 ± 0.01 <sup>bY</sup>  |     |     |            |
| 20:0                  | Colostrum         | 0.10 ± 0.07 <sup>b</sup> | 0.13 ± 0.05 <sup>bX</sup>  | 0.10 ± 0.04 <sup>cY</sup>  | 0.11 ± 0.10 <sup>aXY</sup>  | 0.03 ± 0.04 <sup>aZ</sup>  | 0.14 ± 0.05 <sup>aX</sup>  | *** | *** | ***        |
|                       | Transitional      | 0.13 ± 0.08 <sup>a</sup> | 0.16 ± 0.09 <sup>bXY</sup> | 0.15 ± 0.04 <sup>bXY</sup> | 0.11 ± 0.04 <sup>aY</sup>   | 0.04 ± 0.03 <sup>aZ</sup>  | 0.18 ± 0.11 <sup>aX</sup>  |     |     |            |
|                       | Mature            | 0.14 ± 0.11 <sup>a</sup> | 0.24 ± 0.07 <sup>aX</sup>  | 0.22 ± 0.16 <sup>aX</sup>  | 0.12 ± 0.04 <sup>aY</sup>   | 0.04 ± 0.02 <sup>aZ</sup>  | 0.08 ± 0.02 <sup>bYZ</sup> |     |     |            |
| 22:0                  | Colostrum         | 0.04 ± 0.10 <sup>b</sup> | 0.02 ± 0.01 <sup>bZ</sup>  | 0.01 ± 0.01 <sup>bZ</sup>  | 0.09 ± 0.19 <sup>bX</sup>   | 0.05 ± 0.06 <sup>aXY</sup> | 0.03 ± 0.02 <sup>aXY</sup> | *** | *** | ***        |
|                       | Transitional      | 0.02 ± 0.03 <sup>b</sup> | 0.02 ± 0.02 <sup>bY</sup>  | 0.01 ± 0.02 <sup>bY</sup>  | 0.05 ± 0.04 <sup>bX</sup>   | 0.01 ± 0.01 <sup>bY</sup>  | 0.02 ± 0.02 <sup>bY</sup>  |     |     |            |
|                       | Mature            | 0.12 ± 0.27 <sup>a</sup> | 0.05 ± 0.05 <sup>aY</sup>  | 0.05 ± 0.04 <sup>aY</sup>  | 0.10 ± 0.46 <sup>aX</sup>   | 0.02 ± 0.01 <sup>bY</sup>  | 0.02 ± 0.02 <sup>bY</sup>  |     |     |            |
| 24:0                  | Colostrum         | 0.20 ± 0.14 <sup>a</sup> | 0.27 ± 0.08 <sup>aX</sup>  | 0.05 ± 0.03 <sup>bZ</sup>  | 0.30 ± 0.17 <sup>aX</sup>   | 0.14 ± 0.07 <sup>aY</sup>  | 0.23 ± 0.11 <sup>aX</sup>  | *** | *** | ***        |
|                       | Transitional      | 0.13 ± 0.11 <sup>b</sup> | 0.09 ± 0.11 <sup>cX</sup>  | 0.16 ± 0.15 <sup>aX</sup>  | 0.15 ± 0.11 <sup>bX</sup>   | 0.11 ± 0.05 <sup>aX</sup>  | 0.11 ± 0.10 <sup>bX</sup>  |     |     |            |
|                       | Mature            | 0.13 ± 0.09 <sup>b</sup> | 0.19 ± 0.10 <sup>bX</sup>  | 0.12 ± 0.12 <sup>abY</sup> | 0.17 ± 0.07 <sup>bXY</sup>  | 0.13 ± 0.05 <sup>aY</sup>  | 0.06 ± 0.03 <sup>bZ</sup>  |     |     |            |
| 16:1 n-7              | Colostrum         | 2.51 ± 0.68 <sup>b</sup> | 2.56 ± 0.51 <sup>bY</sup>  | 1.91 ± 0.53 <sup>bZ</sup>  | 2.57 ± 0.61 <sup>aY</sup>   | 2.99 ± 0.61 <sup>bX</sup>  | 2.57 ± 0.68 <sup>aY</sup>  | *** | *** | *          |
|                       | Transitional      | 2.79 ± 0.72 <sup>a</sup> | 2.65 ± 0.82 <sup>bX</sup>  | 2.71 ± 0.64 <sup>aX</sup>  | 2.77 ± 0.55 <sup>aX</sup>   | 3.02 ± 0.69 <sup>bX</sup>  | 2.78 ± 0.91 <sup>aX</sup>  |     |     |            |
|                       | Mature            | 2.99 ± 0.87 <sup>a</sup> | 3.26 ± 0.92 <sup>aX</sup>  | 2.63 ± 0.49 <sup>aY</sup>  | 2.73 ± 0.61 <sup>aY</sup>   | 3.61 ± 1.07 <sup>aX</sup>  | 2.74 ± 0.77 <sup>aY</sup>  |     |     |            |
| 17:1 n-7              | Colostrum         | 0.14 ± 0.06 <sup>a</sup> | 0.15 ± 0.03 <sup>aXY</sup> | 0.11 ± 0.04 <sup>bZ</sup>  | 0.14 ± 0.09 <sup>aXYZ</sup> | 0.13 ± 0.04 <sup>aYZ</sup> | 0.17 ± 0.05 <sup>aX</sup>  | NS  | *   | NS         |
|                       | Transitional      | 0.14 ± 0.04 <sup>a</sup> | 0.14 ± 0.06 <sup>aXY</sup> | 0.14 ± 0.04 <sup>aXY</sup> | 0.14 ± 0.03 <sup>aXY</sup>  | 0.13 ± 0.02 <sup>aY</sup>  | 0.16 ± 0.05 <sup>aX</sup>  |     |     |            |
|                       | Mature            | 0.15 ± 0.06 <sup>a</sup> | 0.16 ± 0.04 <sup>aX</sup>  | 0.16 ± 0.11 <sup>aX</sup>  | 0.13 ± 0.04 <sup>aX</sup>   | 0.14 ± 0.02 <sup>aX</sup>  | 0.14 ± 0.04 <sup>aX</sup>  |     |     |            |
| 18:1 n-9 <sub>t</sub> | Colostrum         | 0.03 ± 0.02 <sup>a</sup> | 0.04 ± 0.02 <sup>aXY</sup> | 0.03 ± 0.02 <sup>bYZ</sup> | 0.03 ± 0.02 <sup>aYZ</sup>  | 0.02 ± 0.02 <sup>aZ</sup>  | 0.05 ± 0.02 <sup>aX</sup>  | NS  | *** | ***        |
|                       | Transitional      | 0.03 ± 0.03 <sup>a</sup> | 0.04 ± 0.02 <sup>aY</sup>  | 0.03 ± 0.02 <sup>bYZ</sup> | 0.02 ± 0.03 <sup>aZ</sup>   | 0.02 ± 0.02 <sup>aZ</sup>  | 0.06 ± 0.04 <sup>aX</sup>  |     |     |            |
|                       | Mature            | 0.04 ± 0.07 <sup>a</sup> | 0.03 ± 0.04 <sup>aY</sup>  | 0.09 ± 0.12 <sup>aX</sup>  | 0.02 ± 0.02 <sup>aY</sup>   | 0.02 ± 0.02 <sup>aY</sup>  | 0.01 ± 0.01 <sup>bY</sup>  |     |     |            |
| 20:1 n-9              | Colostrum         | 0.35 ± 0.15 <sup>a</sup> | 0.42 ± 0.10 <sup>bX</sup>  | 0.29 ± 0.07 <sup>bYZ</sup> | 0.47 ± 0.19 <sup>aX</sup>   | 0.25 ± 0.14 <sup>bZ</sup>  | 0.35 ± 0.13 <sup>aXY</sup> | NS  | *** | ***        |

|           |              |                           |                            |                            |                            |                            |                            |     |     |     |
|-----------|--------------|---------------------------|----------------------------|----------------------------|----------------------------|----------------------------|----------------------------|-----|-----|-----|
|           | Transitional | 0.32 ± 0.14 <sup>a</sup>  | 0.29 ± 0.13 <sup>cX</sup>  | 0.37 ± 0.12 <sup>aX</sup>  | 0.35 ± 0.16 <sup>bX</sup>  | 0.29 ± 0.16 <sup>abX</sup> | 0.32 ± 0.13 <sup>aX</sup>  |     |     |     |
|           | Mature       | 0.35 ± 0.21 <sup>a</sup>  | 0.56 ± 0.21 <sup>aX</sup>  | 0.29 ± 0.15 <sup>bY</sup>  | 0.36 ± 0.16 <sup>abY</sup> | 0.38 ± 0.24 <sup>aY</sup>  | 0.16 ± 0.05 <sup>bZ</sup>  |     |     |     |
| 18:2 n-6t | Colostrum    | 0.04 ± 0.03 <sup>a</sup>  | 0.04 ± 0.02 <sup>bY</sup>  | 0.02 ± 0.01 <sup>bZ</sup>  | 0.04 ± 0.02 <sup>aY</sup>  | 0.02 ± 0.03 <sup>aZ</sup>  | 0.07 ± 0.03 <sup>aX</sup>  | NS  | NS  | NS  |
|           | Transitional | 0.04 ± 0.03 <sup>a</sup>  | 0.03 ± 0.02 <sup>bY</sup>  | 0.03 ± 0.02 <sup>bY</sup>  | 0.04 ± 0.02 <sup>aY</sup>  | 0.02 ± 0.01 <sup>aY</sup>  | 0.07 ± 0.05 <sup>aX</sup>  |     |     |     |
|           | Mature       | 0.07 ± 0.04 <sup>a</sup>  | 0.07 ± 0.03 <sup>aX</sup>  | 0.11 ± 0.12 <sup>aX</sup>  | 0.04 ± 0.02 <sup>aX</sup>  | 0.03 ± 0.02 <sup>aX</sup>  | 0.12 ± 3.44 <sup>aX</sup>  |     |     |     |
| 18:3 n-6  | Colostrum    | 0.04 ± 0.03 <sup>a</sup>  | 0.06 ± 0.02 <sup>bX</sup>  | 0.02 ± 0.01 <sup>bY</sup>  | 0.03 ± 0.02 <sup>cY</sup>  | 0.02 ± 0.02 <sup>bY</sup>  | 0.06 ± 0.03 <sup>aX</sup>  | *** | *** | *** |
|           | Transitional | 0.05 ± 0.03 <sup>a</sup>  | 0.05 ± 0.04 <sup>bX</sup>  | 0.05 ± 0.02 <sup>bX</sup>  | 0.05 ± 0.02 <sup>bX</sup>  | 0.05 ± 0.02 <sup>aX</sup>  | 0.06 ± 0.03 <sup>aX</sup>  |     |     |     |
|           | Mature       | 0.08 ± 0.06 <sup>a</sup>  | 0.11 ± 0.03 <sup>aX</sup>  | 0.10 ± 0.11 <sup>aX</sup>  | 0.06 ± 0.01 <sup>aY</sup>  | 0.05 ± 0.02 <sup>aY</sup>  | 0.06 ± 0.03 <sup>aY</sup>  |     |     |     |
| 18:3 n-3t | Colostrum    | 0.06 ± 0.05 <sup>a</sup>  | 0.05 ± 0.01 <sup>bX</sup>  | 0.06 ± 0.02 <sup>bX</sup>  | 0.05 ± 0.10 <sup>aX</sup>  | 0.06 ± 0.02 <sup>aX</sup>  | 0.06 ± 0.02 <sup>aX</sup>  | *   | **  | *   |
|           | Transitional | 0.05 ± 0.03 <sup>a</sup>  | 0.04 ± 0.02 <sup>bYZ</sup> | 0.05 ± 0.02 <sup>bY</sup>  | 0.03 ± 0.02 <sup>aZ</sup>  | 0.04 ± 0.02 <sup>aYZ</sup> | 0.08 ± 0.05 <sup>aX</sup>  |     |     |     |
|           | Mature       | 0.07 ± 0.10 <sup>a</sup>  | 0.10 ± 0.05 <sup>aXY</sup> | 0.11 ± 0.06 <sup>aX</sup>  | 0.04 ± 0.03 <sup>aY</sup>  | 0.02 ± 0.02 <sup>bY</sup>  | 0.09 ± 0.21 <sup>aXY</sup> |     |     |     |
| 20:2 n-6  | Colostrum    | 0.40 ± 0.20 <sup>a</sup>  | 0.50 ± 0.14 <sup>aXY</sup> | 0.26 ± 0.08 <sup>abZ</sup> | 0.58 ± 0.20 <sup>aX</sup>  | 0.23 ± 0.12 <sup>aZ</sup>  | 0.47 ± 0.13 <sup>aY</sup>  | *** | *** | *** |
|           | Transitional | 0.28 ± 0.11 <sup>b</sup>  | 0.25 ± 0.13 <sup>bY</sup>  | 0.29 ± 0.10 <sup>aY</sup>  | 0.37 ± 0.11 <sup>bX</sup>  | 0.23 ± 0.06 <sup>aY</sup>  | 0.26 ± 0.11 <sup>bY</sup>  |     |     |     |
|           | Mature       | 0.23 ± 0.10 <sup>c</sup>  | 0.32 ± 0.08 <sup>bX</sup>  | 0.22 ± 0.13 <sup>bY</sup>  | 0.26 ± 0.06 <sup>cY</sup>  | 0.20 ± 0.05 <sup>aY</sup>  | 0.13 ± 0.03 <sup>cZ</sup>  |     |     |     |
| 20:3 n-6  | Colostrum    | 0.22 ± 0.13 <sup>a</sup>  | 0.30 ± 0.10 <sup>aX</sup>  | 0.16 ± 0.06 <sup>bY</sup>  | 0.31 ± 0.15 <sup>aX</sup>  | 0.09 ± 0.05 <sup>bZ</sup>  | 0.26 ± 0.07 <sup>aX</sup>  | **  | *** | *** |
|           | Transitional | 0.18 ± 0.08 <sup>b</sup>  | 0.16 ± 0.09 <sup>bXY</sup> | 0.20 ± 0.08 <sup>abX</sup> | 0.21 ± 0.08 <sup>bX</sup>  | 0.12 ± 0.04 <sup>aY</sup>  | 0.18 ± 0.07 <sup>bX</sup>  |     |     |     |
|           | Mature       | 0.21 ± 0.17 <sup>ab</sup> | 0.31 ± 0.10 <sup>aX</sup>  | 0.29 ± 0.28 <sup>aX</sup>  | 0.19 ± 0.06 <sup>bY</sup>  | 0.13 ± 0.04 <sup>aY</sup>  | 0.13 ± 0.13 <sup>bY</sup>  |     |     |     |
| 20:3 n-3  | Colostrum    | 0.01 ± 0.01 <sup>a</sup>  | 0.02 ± 0.02 <sup>aX</sup>  | 0.01 ± 0.02 <sup>aY</sup>  | 0.01 ± 0.01 <sup>aXY</sup> | 0.00 ± 0.01 <sup>aY</sup>  | 0.01 ± 0.01 <sup>aXY</sup> | NS  | *** | **  |
|           | Transitional | 0.01 ± 0.01 <sup>a</sup>  | 0.01 ± 0.01 <sup>aX</sup>  | 0.01 ± 0.01 <sup>aX</sup>  | 0.00 ± 0.01 <sup>aY</sup>  | 0.00 ± 0.00 <sup>aY</sup>  | 0.01 ± 0.02 <sup>aX</sup>  |     |     |     |
|           | Mature       | 0.01 ± 0.02 <sup>a</sup>  | 0.02 ± 0.01 <sup>aX</sup>  | 0.02 ± 0.04 <sup>aX</sup>  | 0.00 ± 0.00 <sup>aY</sup>  | 0.00 ± 0.00 <sup>aY</sup>  | 0.00 ± 0.01 <sup>aY</sup>  |     |     |     |
| 20:5 n-3  | Colostrum    | 0.08 ± 0.10 <sup>b</sup>  | 0.05 ± 0.06 <sup>cZ</sup>  | 0.21 ± 0.10 <sup>abX</sup> | 0.02 ± 0.03 <sup>bZ</sup>  | 0.01 ± 0.02 <sup>aZ</sup>  | 0.11 ± 0.09 <sup>bY</sup>  | *** | *** | *** |
|           | Transitional | 0.11 ± 0.13 <sup>b</sup>  | 0.14 ± 0.11 <sup>bY</sup>  | 0.16 ± 0.15 <sup>bY</sup>  | 0.02 ± 0.03 <sup>bZ</sup>  | 0.02 ± 0.03 <sup>aZ</sup>  | 0.22 ± 0.13 <sup>aX</sup>  |     |     |     |
|           | Mature       | 0.59 ± 1.33 <sup>a</sup>  | 0.34 ± 0.12 <sup>aX</sup>  | 0.25 ± 0.14 <sup>aY</sup>  | 0.07 ± 0.04 <sup>aY</sup>  | 0.02 ± 0.04 <sup>aZ</sup>  | 0.09 ± 0.05 <sup>bZ</sup>  |     |     |     |
| 22:2 n-6  | Colostrum    | 0.18 ± 0.12 <sup>a</sup>  | 0.25 ± 0.07 <sup>aX</sup>  | 0.07 ± 0.03 <sup>aY</sup>  | 0.27 ± 0.15 <sup>aX</sup>  | 0.10 ± 0.07 <sup>aY</sup>  | 0.25 ± 0.08 <sup>aX</sup>  | *** | *** | *** |
|           | Transitional | 0.12 ± 0.09 <sup>b</sup>  | 0.09 ± 0.09 <sup>cY</sup>  | 0.12 ± 0.07 <sup>aY</sup>  | 0.19 ± 0.12 <sup>bX</sup>  | 0.08 ± 0.03 <sup>aY</sup>  | 0.10 ± 0.09 <sup>bY</sup>  |     |     |     |
|           | Mature       | 0.10 ± 0.10 <sup>b</sup>  | 0.16 ± 0.08 <sup>bX</sup>  | 0.13 ± 0.18 <sup>aX</sup>  | 0.11 ± 0.05 <sup>cXY</sup> | 0.07 ± 0.04 <sup>aYZ</sup> | 0.03 ± 0.02 <sup>cZ</sup>  |     |     |     |



|          |              |                          |                           |                            |                            |                           |                           |    |     |     |
|----------|--------------|--------------------------|---------------------------|----------------------------|----------------------------|---------------------------|---------------------------|----|-----|-----|
| 22:5 n-3 | Colostrum    | 0.08 ± 0.07 <sup>a</sup> | 0.16 ± 0.04 <sup>bX</sup> | 0.06 ± 0.04 <sup>aYZ</sup> | 0.06 ± 0.05 <sup>aYZ</sup> | 0.02 ± 0.04 <sup>aZ</sup> | 0.12 ± 0.04 <sup>aY</sup> | NS | *** | *** |
|          | Transitional | 0.08 ± 0.06 <sup>a</sup> | 0.12 ± 0.05 <sup>bX</sup> | 0.11 ± 0.06 <sup>aX</sup>  | 0.06 ± 0.05 <sup>aY</sup>  | 0.03 ± 0.02 <sup>aY</sup> | 0.10 ± 0.06 <sup>aX</sup> |    |     |     |
|          | Mature       | 0.09 ± 0.10 <sup>a</sup> | 0.26 ± 0.10 <sup>aX</sup> | 0.10 ± 0.09 <sup>aY</sup>  | 0.06 ± 0.03 <sup>aZ</sup>  | 0.04 ± 0.02 <sup>aZ</sup> | 0.03 ± 0.02 <sup>bZ</sup> |    |     |     |

*Sn*-2 fatty acids in Table S3 are present in breast milk but not discussed in the manuscript. Values are represented as mean ± SD. The data was presented as a percentage of the total *sn*-2 FAs. The number of mothers in Chengdu, Nanning, Tianjin, Wuhan, and Xi'an were 18, 22, 20, 21 and 19, respectively, for a total of 100. The number of breast milk samples was 54, 66, 60, 63 and 57, respectively, for a total of 300. § Different superscript uppercase letters indicate significant differences ( $P < 0.05$ ) with a row; different superscript lowercase letters indicate significant difference ( $P < 0.05$ ) with a column. ¶ R,  $P$  values for the region; S,  $P$  values for lactational stage; R × S,  $P$  values for the region by lactational stage. NS,  $P > 0.05$ , \*,  $P < 0.05$ , \*\*,  $P < 0.01$ , \*\*\*,  $P < 0.001$ .

**Table S4.** Distribution characteristics of fatty acids in breast milk of this study.

|          | Content       |                      | Relative content |                    |
|----------|---------------|----------------------|------------------|--------------------|
|          | Total FAs (%) | <i>sn</i> -2 FAs (%) | <i>sn</i> -2 (%) | <i>sn</i> -1,3 (%) |
| 10:0     | 0.96 ± 0.54   | 0.42 ± 0.28          | 23.50 ± 14.56    | 76.50 ± 19.62      |
| 14:0     | 4.59 ± 1.88   | 8.46 ± 3.14          | 62.81 ± 9.89     | 37.19 ± 9.91       |
| 16:0     | 21.39 ± 2.50  | 50.08 ± 5.62         | 78.56 ± 8.12     | 21.44 ± 8.13       |
| 18:0     | 4.90 ± 1.00   | 1.60 ± 0.82          | 10.67 ± 4.35     | 89.33 ± 4.35       |
| 18:1 n-9 | 34.51 ± 4.01  | 14.64 ± 3.37         | 14.08 ± 2.52     | 85.92 ± 2.53       |
| 18:2 n-6 | 21.47 ± 4.22  | 11.94 ± 3.09         | 18.66 ± 3.83     | 81.34 ± 3.84       |
| 18:3 n-3 | 1.39 ± 0.73   | 0.76 ± 0.46          | 18.61 ± 8.52     | 81.39 ± 8.53       |
| 20:4 n-6 | 0.68 ± 0.29   | 0.93 ± 0.32          | 44.59 ± 10.52    | 55.41 ± 9.56       |
| 22:6 n-3 | 0.30 ± 0.16   | 0.46 ± 0.17          | 53.33 ± 19.21    | 46.67 ± 21.39      |
| SFA      | 36.91 ± 4.77  | 66.61 ± 6.01         | 60.67 ± 5.95     | 39.33 ± 5.96       |
| MUFA     | 37.58 ± 4.32  | 18.25 ± 3.68         | 16.13 ± 2.35     | 83.87 ± 2.36       |
| PUFA     | 25.50 ± 4.41  | 15.15 ± 3.54         | 19.97 ± 4.12     | 80.03 ± 4.12       |
| n-6 PUFA | 23.56 ± 4.29  | 13.69 ± 3.26         | 19.54 ± 3.98     | 80.46 ± 3.99       |
| n-3 PUFA | 1.95 ± 0.79   | 1.46 ± 0.55          | 26.29 ± 8.33     | 73.71 ± 8.34       |

The proportion of each FA in the internal position compared to the 3 positions of the milk TAG was calculated by the following equation (for example for DHA): %DHA (*sn*-2) = [(%DHA in 2-MAG)/(%DHA in TAG × 3)] × 100.

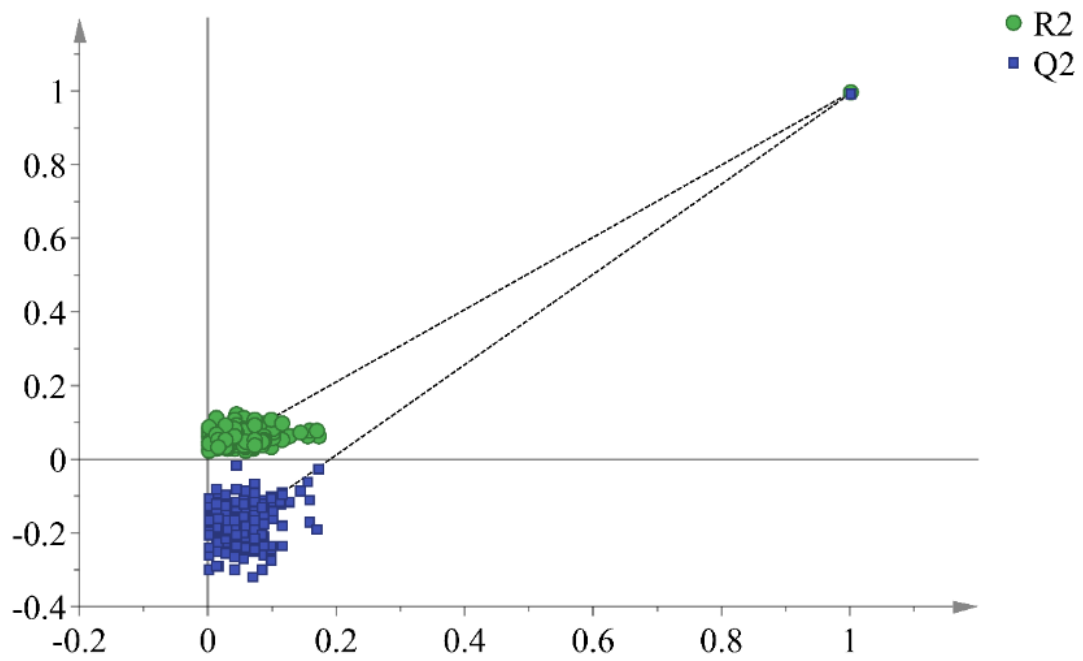

**Figure S1.** PLS-DA analysis goodness mode for total fatty acids in breast milk of three groups of edible oils in maternal diet.

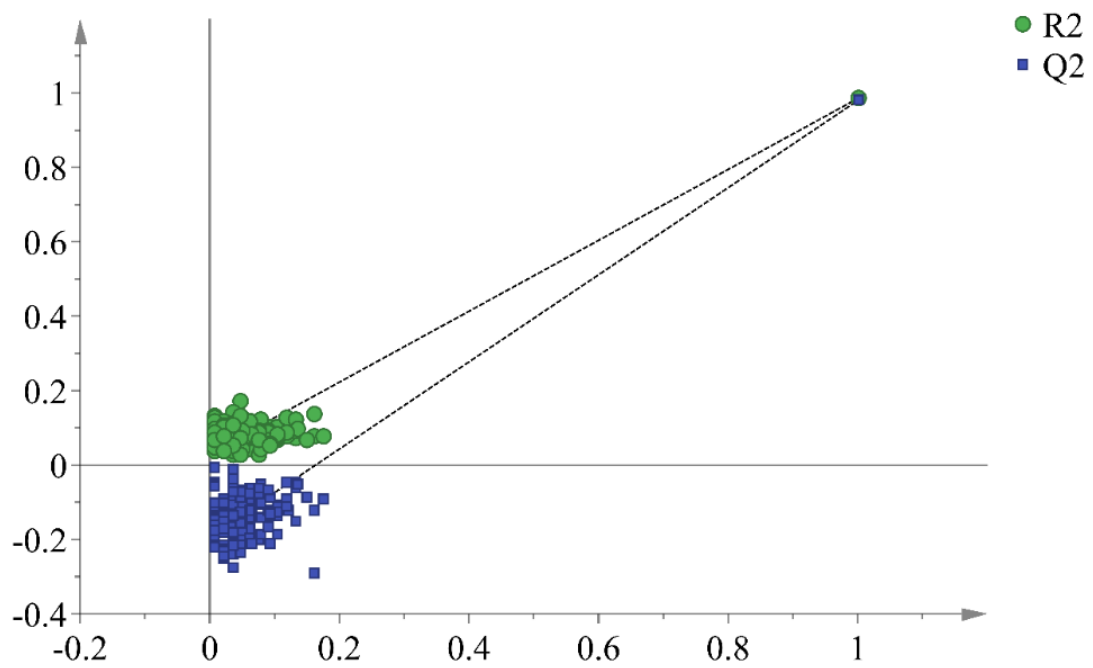

**Figure S2.** PLS-DA analysis goodness mode for *sn*-2 fatty acids in breast milk of three groups of edible oils in maternal diet.
